# Supplementary material
Source: publisher figshare collection journal article supplement (https://acs.figshare.com/ndownloader/files/6451191)
Supplement: Supplementary file 1 [file 6451191]

 
data_2 
 
_audit_creation_method            SHELXL-97 
_chemical_name_systematic 
; 
 '[Pr2(4-cba)6(phen)2(H2O)2]' 
; 
_chemical_name_common             '[Pr2(4-cba)6(phen)2(H2O)2]' 
_chemical_melting_point           ? 
_chemical_formula_moiety          '[Pr2(4-cba)6(phen)2(H2O)2]' 
_chemical_formula_sum 
 'C72 H44 N10 O14 Pr2' 
_chemical_formula_weight          1554.99 
 
loop_ 
 _atom_type_symbol 
 _atom_type_description 
 _atom_type_scat_dispersion_real 
 _atom_type_scat_dispersion_imag 
 _atom_type_scat_source 
 'C'  'C'   0.0033   0.0016 
 'International Tables Vol C Tables 4.2.6.8 and 6.1.1.4' 
 'H'  'H'   0.0000   0.0000 
 'International Tables Vol C Tables 4.2.6.8 and 6.1.1.4' 
 'N'  'N'   0.0061   0.0033 
 'International Tables Vol C Tables 4.2.6.8 and 6.1.1.4' 
 'O'  'O'   0.0106   0.0060 
 'International Tables Vol C Tables 4.2.6.8 and 6.1.1.4' 
 'Pr'  'Pr'  -0.2180   2.8214 
 'International Tables Vol C Tables 4.2.6.8 and 6.1.1.4' 
 
_symmetry_cell_setting            triclinic  
_symmetry_space_group_name_H-M    P-1        
 
loop_ 
 _symmetry_equiv_pos_as_xyz 
 'x, y, z' 
 '-x, -y, -z' 
 
_cell_length_a                    8.308(2)                                            
_cell_length_b                    12.852(4)                                           
_cell_length_c                    16.419(5)                                           
_cell_angle_alpha                 97.443(4)                                           
_cell_angle_beta                  101.952(4)                                          
_cell_angle_gamma                 99.497(2)                                           
_cell_volume                      1667.2(8)                                           
_cell_formula_units_Z             1                                                   
_cell_measurement_temperature     293(2)                                              
_cell_measurement_reflns_used     5627                                                
_cell_measurement_theta_min       2.2404                                              
_cell_measurement_theta_max       27.4835                                             
                                                                                      
_exptl_crystal_description        'Prism'                                             
_exptl_crystal_colour             'pale Green'                                        
_exptl_crystal_size_max           0.3200                                              
_exptl_crystal_size_mid           0.2000                                              
_exptl_crystal_size_min           0.1000                                              
_exptl_crystal_density_meas       ?                                                   
_exptl_crystal_density_diffrn     1.549                                               
_exptl_crystal_density_method     'not measured'                                      
_exptl_crystal_F_000              776                                                 
_exptl_absorpt_coefficient_mu     1.518                                               
_exptl_absorpt_correction_type    'Multi-scan'                                        
_exptl_absorpt_correction_T_min   0.8100                                              
_exptl_absorpt_correction_T_max   1.0000                                              
_exptl_absorpt_process_details    'Sphere (Rigaku CrystalClear)'                      
                                                                                      
_exptl_special_details                                                                
;                                                                                     
 ?                                                                                    
;                                                                                     
                                                                                      
_diffrn_ambient_temperature       293(2)                                              
_diffrn_radiation_wavelength      0.71073                                             
_diffrn_radiation_type            MoK\a                                               
_diffrn_radiation_source          'Rotating Anode'                                    
_diffrn_radiation_monochromator   graphite                                            
_diffrn_measurement_device_type   'Rigaku Mercury CCD'                                
_diffrn_measurement_method        \w                                                  
_diffrn_detector_area_resol_mean  ?                                                   
_diffrn_standards_number          ?                                                   
_diffrn_standards_interval_count  ?                                                   
_diffrn_standards_interval_time   ?                                                   
_diffrn_standards_decay_%         ?                                                   
_diffrn_reflns_number             10571                                               
_diffrn_reflns_av_R_equivalents   0.0180                                              
_diffrn_reflns_av_sigmaI/netI     0.0293                                              
_diffrn_reflns_limit_h_min        -9                                                  
_diffrn_reflns_limit_h_max        9                                                   
_diffrn_reflns_limit_k_min        -15                                                 
_diffrn_reflns_limit_k_max        14                                                  
_diffrn_reflns_limit_l_min        -19                                                 
_diffrn_reflns_limit_l_max        18                                                  
_diffrn_reflns_theta_min          3.17                                                
_diffrn_reflns_theta_max          25.03                                               
_reflns_number_total              5825                                                
_reflns_number_gt                 5532                                                
_reflns_threshold_expression      >2sigma(I)                                          
                                                                                      
_computing_data_collection        'CrystalClear (Rigaku Corp., 2002)'                 
_computing_cell_refinement        'CrystalClear (Rigaku Corp., 2002)'                 
_computing_data_reduction         'CrystalClear (Rigaku Corp., 2002)'                 
_computing_structure_solution     'Siemens SHELXTL^TM^ 5'                             
_computing_structure_refinement   'Siemens SHELXTL^TM^ 5'                             
_computing_molecular_graphics     'Bruker SHELXTL'                                    
_computing_publication_material   'Siemens SHELXTL^TM^ 5'                             
                                                                                      
_refine_special_details 
; 
 Refinement of F^2^ against ALL reflections.  The weighted R-factor wR and 
 goodness of fit S are based on F^2^, conventional R-factors R are based 
 on F, with F set to zero for negative F^2^. The threshold expression of 
 F^2^ > 2sigma(F^2^) is used only for calculating R-factors(gt) etc. and is 
 not relevant to the choice of reflections for refinement.  R-factors based 
 on F^2^ are statistically about twice as large as those based on F, and R- 
 factors based on ALL data will be even larger. 
; 
 
_refine_ls_structure_factor_coef  Fsqd  
_refine_ls_matrix_type            full 
_refine_ls_weighting_scheme       calc  
_refine_ls_weighting_details 
 'calc w=1/[\s^2^(Fo^2^)+(0.0420P)^2^+0.6408P] where P=(Fo^2^+2Fc^2^)/3' 
_atom_sites_solution_primary      direct 
_atom_sites_solution_secondary    difmap 
_atom_sites_solution_hydrogens    geom 
_refine_ls_hydrogen_treatment     mixed 
_refine_ls_extinction_method      none 
_refine_ls_extinction_coef        ? 
_refine_ls_number_reflns          5825 
_refine_ls_number_parameters      448 
_refine_ls_number_restraints      14 
_refine_ls_R_factor_all           0.0298 
_refine_ls_R_factor_gt            0.0273 
_refine_ls_wR_factor_ref          0.0697 
_refine_ls_wR_factor_gt           0.0676 
_refine_ls_goodness_of_fit_ref    1.004 
_refine_ls_restrained_S_all       1.020 
_refine_ls_shift/su_max           0.003 
_refine_ls_shift/su_mean          0.000 
 
loop_ 
 _atom_site_label 
 _atom_site_type_symbol 
 _atom_site_fract_x 
 _atom_site_fract_y 
 _atom_site_fract_z 
 _atom_site_U_iso_or_equiv 
 _atom_site_adp_type 
 _atom_site_occupancy 
 _atom_site_symmetry_multiplicity 
 _atom_site_calc_flag 
 _atom_site_refinement_flags 
 _atom_site_disorder_assembly 
 _atom_site_disorder_group 
Pr1 Pr 0.717160(18) 0.132701(12) 0.522729(9) 0.03024(7) Uani 1 1 d . . . 
O1W O 1.0036(3) 0.13030(18) 0.50371(14) 0.0433(5) Uani 1 1 d D . . 
H1WA H 1.047(4) 0.084(2) 0.4680(17) 0.052 Uiso 1 1 d D . . 
H1WB H 1.082(3) 0.147(3) 0.5569(12) 0.052 Uiso 1 1 d D . . 
O11 O 0.4476(3) 0.15348(17) 0.44024(13) 0.0412(5) Uani 1 1 d . . . 
O12 O 0.2160(2) 0.03013(17) 0.42541(13) 0.0393(5) Uani 1 1 d . . . 
O21 O 0.6959(3) 0.03643(18) 0.37862(13) 0.0471(5) Uani 1 1 d . . . 
O22 O 0.4772(3) -0.07674(18) 0.39397(13) 0.0421(5) Uani 1 1 d . . . 
O31 O 0.9154(3) 0.22107(19) 0.65338(13) 0.0495(6) Uani 1 1 d . . . 
O32 O 1.1790(3) 0.2025(3) 0.65851(16) 0.0658(8) Uani 1 1 d . . . 
N1 N 0.6584(4) 0.3242(2) 0.57614(17) 0.0459(7) Uani 1 1 d . . . 
N2 N 0.7851(3) 0.2904(2) 0.43605(17) 0.0446(6) Uani 1 1 d . . . 
N11 N 0.0854(6) 0.1456(5) -0.0172(3) 0.137(2) Uani 1 1 d . . . 
N21 N 0.3205(7) -0.1995(5) -0.0798(2) 0.128(2) Uani 1 1 d . . . 
N31 N 1.3046(9) 0.4939(8) 1.0996(4) 0.201(4) Uani 1 1 d U . . 
C1 C 0.5976(6) 0.3416(3) 0.6442(2) 0.0642(11) Uani 1 1 d . . . 
H1A H 0.5605 0.2830 0.6680 0.077 Uiso 1 1 calc R . . 
C2 C 0.5864(7) 0.4430(4) 0.6821(3) 0.0819(15) Uani 1 1 d . . . 
H2A H 0.5470 0.4519 0.7311 0.098 Uiso 1 1 calc R . . 
C3 C 0.6339(6) 0.5279(4) 0.6459(3) 0.0861(16) Uani 1 1 d . . . 
H3A H 0.6272 0.5961 0.6702 0.103 Uiso 1 1 calc R . . 
C4 C 0.6930(5) 0.5146(3) 0.5725(3) 0.0691(12) Uani 1 1 d . . . 
C5 C 0.7413(7) 0.5999(3) 0.5283(4) 0.097(2) Uani 1 1 d . . . 
H5A H 0.7358 0.6693 0.5503 0.116 Uiso 1 1 calc R . . 
C6 C 0.7946(7) 0.5836(3) 0.4558(4) 0.097(2) Uani 1 1 d . . . 
H6A H 0.8222 0.6402 0.4280 0.116 Uiso 1 1 calc R . . 
C7 C 0.8073(5) 0.4780(3) 0.4232(3) 0.0687(12) Uani 1 1 d . . . 
C8 C 0.8583(6) 0.4541(4) 0.3480(4) 0.0888(17) Uani 1 1 d . . . 
H8A H 0.8830 0.5087 0.3177 0.107 Uiso 1 1 calc R . . 
C9 C 0.8723(6) 0.3536(4) 0.3183(3) 0.0800(14) Uani 1 1 d . . . 
H9A H 0.9049 0.3383 0.2679 0.096 Uiso 1 1 calc R . . 
C10 C 0.8365(5) 0.2728(3) 0.3656(2) 0.0618(10) Uani 1 1 d . . . 
H10A H 0.8497 0.2041 0.3466 0.074 Uiso 1 1 calc R . . 
C11 C 0.7671(4) 0.3909(3) 0.4644(2) 0.0494(9) Uani 1 1 d . . . 
C12 C 0.7049(4) 0.4092(3) 0.5396(2) 0.0500(9) Uani 1 1 d . . . 
C101 C 0.2520(4) 0.1163(2) 0.30939(18) 0.0376(7) Uani 1 1 d . . . 
C102 C 0.3616(4) 0.1767(3) 0.2729(2) 0.0466(8) Uani 1 1 d . . . 
H10B H 0.4669 0.2114 0.3054 0.056 Uiso 1 1 calc R . . 
C103 C 0.3172(5) 0.1862(3) 0.1890(2) 0.0590(10) Uani 1 1 d . . . 
H10C H 0.3916 0.2268 0.1647 0.071 Uiso 1 1 calc R . . 
C104 C 0.1619(5) 0.1349(4) 0.1421(2) 0.0705(12) Uani 1 1 d . . . 
C105 C 0.0507(5) 0.0743(5) 0.1776(3) 0.0915(17) Uani 1 1 d U . . 
H10D H -0.0545 0.0397 0.1450 0.110 Uiso 1 1 calc R . . 
C106 C 0.0959(5) 0.0653(4) 0.2615(2) 0.0689(12) Uani 1 1 d . . . 
H10E H 0.0212 0.0247 0.2857 0.083 Uiso 1 1 calc R . . 
C107 C 0.3093(4) 0.0991(2) 0.39897(18) 0.0332(6) Uani 1 1 d . . . 
C108 C 0.1178(6) 0.1407(5) 0.0526(3) 0.1003(19) Uani 1 1 d . . . 
C201 C 0.5114(4) -0.0704(2) 0.25480(18) 0.0373(7) Uani 1 1 d . . . 
C202 C 0.6144(5) -0.0372(3) 0.2031(2) 0.0600(10) Uani 1 1 d . . . 
H20A H 0.7183 0.0073 0.2269 0.072 Uiso 1 1 calc R . . 
C203 C 0.5655(5) -0.0692(4) 0.1171(2) 0.0737(13) Uani 1 1 d . . . 
H20B H 0.6367 -0.0472 0.0830 0.088 Uiso 1 1 calc R . . 
C204 C 0.4102(5) -0.1340(4) 0.0813(2) 0.0626(10) Uani 1 1 d . . . 
C205 C 0.3051(5) -0.1638(4) 0.1324(2) 0.0649(11) Uani 1 1 d . . . 
H20C H 0.1989 -0.2054 0.1085 0.078 Uiso 1 1 calc R . . 
C206 C 0.3561(4) -0.1323(3) 0.2186(2) 0.0507(9) Uani 1 1 d . . . 
H20D H 0.2843 -0.1534 0.2526 0.061 Uiso 1 1 calc R . . 
C207 C 0.5675(4) -0.0349(2) 0.34906(18) 0.0355(6) Uani 1 1 d . . . 
C208 C 0.3598(7) -0.1704(5) -0.0086(3) 0.0884(16) Uani 1 1 d . . . 
C301 C 1.1213(4) 0.2965(3) 0.7787(2) 0.0476(8) Uani 1 1 d . . . 
C302 C 1.2804(5) 0.2987(4) 0.8272(2) 0.0683(11) Uani 1 1 d . . . 
H30A H 1.3550 0.2646 0.8041 0.082 Uiso 1 1 calc R . . 
C303 C 1.3279(6) 0.3515(5) 0.9101(3) 0.0912(16) Uani 1 1 d . . . 
H30B H 1.4338 0.3519 0.9428 0.109 Uiso 1 1 calc R . . 
C304 C 1.2188(7) 0.4033(5) 0.9437(3) 0.0947(17) Uani 1 1 d . . . 
C305 C 1.0640(6) 0.4051(5) 0.8944(3) 0.0918(16) Uani 1 1 d . . . 
H30C H 0.9921 0.4430 0.9165 0.110 Uiso 1 1 calc R . . 
C306 C 1.0155(5) 0.3514(4) 0.8129(2) 0.0663(11) Uani 1 1 d . . . 
H30D H 0.9099 0.3522 0.7803 0.080 Uiso 1 1 calc R . . 
C307 C 1.0697(4) 0.2346(3) 0.6904(2) 0.0422(7) Uani 1 1 d . . . 
C308 C 1.2677(8) 0.4531(7) 1.0310(4) 0.148(3) Uani 1 1 d . . . 
 
loop_ 
 _atom_site_aniso_label 
 _atom_site_aniso_U_11 
 _atom_site_aniso_U_22 
 _atom_site_aniso_U_33 
 _atom_site_aniso_U_23 
 _atom_site_aniso_U_13 
 _atom_site_aniso_U_12 
Pr1 0.03306(10) 0.02888(10) 0.03109(10) 0.00479(7) 0.01229(7) 0.00678(7) 
O1W 0.0374(12) 0.0467(13) 0.0491(13) 0.0016(10) 0.0185(9) 0.0120(10) 
O11 0.0397(12) 0.0400(12) 0.0420(12) 0.0076(9) 0.0045(9) 0.0085(10) 
O12 0.0366(11) 0.0406(12) 0.0486(12) 0.0154(10) 0.0171(9) 0.0148(9) 
O21 0.0489(13) 0.0484(14) 0.0401(12) -0.0049(10) 0.0148(10) 0.0021(11) 
O22 0.0469(12) 0.0514(13) 0.0381(11) 0.0134(10) 0.0236(9) 0.0167(10) 
O31 0.0408(13) 0.0585(15) 0.0430(13) -0.0046(11) 0.0050(10) 0.0087(11) 
O32 0.0478(14) 0.093(2) 0.0547(15) -0.0048(14) 0.0067(12) 0.0278(14) 
N1 0.0557(17) 0.0336(14) 0.0446(15) 0.0006(12) 0.0024(13) 0.0146(12) 
N2 0.0424(15) 0.0401(16) 0.0510(16) 0.0154(12) 0.0106(12) 0.0016(12) 
N11 0.119(4) 0.221(7) 0.055(3) 0.052(3) 0.002(2) -0.012(4) 
N21 0.147(5) 0.173(5) 0.041(2) -0.001(3) 0.009(2) -0.001(4) 
N31 0.145(5) 0.311(10) 0.092(4) -0.080(5) 0.013(4) 0.003(6) 
C1 0.088(3) 0.057(2) 0.049(2) -0.0016(17) 0.009(2) 0.036(2) 
C2 0.099(4) 0.079(3) 0.065(3) -0.016(2) 0.006(2) 0.050(3) 
C3 0.091(3) 0.052(3) 0.095(4) -0.029(3) -0.011(3) 0.030(2) 
C4 0.061(2) 0.032(2) 0.095(3) -0.006(2) -0.015(2) 0.0096(17) 
C5 0.087(4) 0.025(2) 0.151(5) 0.000(3) -0.022(4) 0.008(2) 
C6 0.099(4) 0.026(2) 0.139(5) 0.016(3) -0.032(4) 0.012(2) 
C7 0.051(2) 0.056(2) 0.095(3) 0.039(2) 0.001(2) -0.0017(18) 
C8 0.072(3) 0.080(4) 0.119(4) 0.066(3) 0.016(3) -0.002(3) 
C9 0.072(3) 0.095(4) 0.081(3) 0.045(3) 0.028(2) 0.002(3) 
C10 0.063(2) 0.063(3) 0.064(2) 0.023(2) 0.0239(19) 0.0008(19) 
C11 0.0364(17) 0.0337(18) 0.070(2) 0.0204(16) -0.0049(16) -0.0020(14) 
C12 0.0435(18) 0.0324(17) 0.060(2) 0.0003(15) -0.0128(16) 0.0058(14) 
C101 0.0363(16) 0.0421(17) 0.0388(16) 0.0103(13) 0.0117(12) 0.0136(13) 
C102 0.0455(18) 0.0460(19) 0.0472(19) 0.0150(15) 0.0094(14) 0.0023(15) 
C103 0.057(2) 0.071(3) 0.051(2) 0.0238(19) 0.0164(17) 0.0035(19) 
C104 0.060(2) 0.107(4) 0.044(2) 0.026(2) 0.0104(18) 0.009(2) 
C105 0.050(2) 0.152(5) 0.056(2) 0.033(3) -0.0039(19) -0.016(3) 
C106 0.043(2) 0.111(4) 0.048(2) 0.027(2) 0.0078(16) -0.004(2) 
C107 0.0337(15) 0.0334(16) 0.0405(16) 0.0101(13) 0.0144(13) 0.0184(13) 
C108 0.077(3) 0.161(6) 0.054(3) 0.037(3) 0.004(2) -0.003(3) 
C201 0.0394(16) 0.0406(17) 0.0371(16) 0.0072(13) 0.0170(13) 0.0114(13) 
C202 0.053(2) 0.080(3) 0.0412(19) 0.0027(18) 0.0204(16) -0.0080(19) 
C203 0.071(3) 0.109(4) 0.040(2) 0.011(2) 0.0270(19) -0.002(2) 
C204 0.070(3) 0.082(3) 0.0325(18) 0.0091(18) 0.0106(17) 0.010(2) 
C205 0.051(2) 0.089(3) 0.045(2) 0.011(2) 0.0021(16) -0.004(2) 
C206 0.0419(18) 0.068(2) 0.0414(18) 0.0106(16) 0.0129(14) 0.0028(16) 
C207 0.0397(16) 0.0379(17) 0.0352(15) 0.0041(13) 0.0171(13) 0.0160(14) 
C208 0.093(3) 0.122(4) 0.037(2) 0.004(2) 0.009(2) 0.000(3) 
C301 0.0487(19) 0.0454(19) 0.0455(19) 0.0048(15) 0.0121(15) 0.0006(15) 
C302 0.055(2) 0.086(3) 0.053(2) -0.002(2) 0.0000(18) 0.011(2) 
C303 0.071(3) 0.127(5) 0.054(3) -0.010(3) -0.009(2) 0.005(3) 
C304 0.086(4) 0.121(5) 0.053(3) -0.022(3) 0.010(3) -0.011(3) 
C305 0.082(3) 0.114(4) 0.067(3) -0.029(3) 0.023(3) 0.013(3) 
C306 0.061(2) 0.077(3) 0.053(2) -0.011(2) 0.0110(18) 0.010(2) 
C307 0.0470(19) 0.0377(17) 0.0414(17) 0.0075(13) 0.0100(14) 0.0072(14) 
C308 0.106(5) 0.226(9) 0.068(4) -0.062(5) 0.009(3) -0.008(5) 
 
_geom_special_details 
; 
 All esds (except the esd in the dihedral angle between two l.s. planes) 
 are estimated using the full covariance matrix.  The cell esds are taken 
 into account individually in the estimation of esds in distances, angles 
 and torsion angles; correlations between esds in cell parameters are only 
 used when they are defined by crystal symmetry.  An approximate (isotropic) 
 treatment of cell esds is used for estimating esds involving l.s. planes. 
; 
 
loop_ 
 _geom_bond_atom_site_label_1 
 _geom_bond_atom_site_label_2 
 _geom_bond_distance 
 _geom_bond_site_symmetry_2 
 _geom_bond_publ_flag 
Pr1 O22 2.405(2) 2_656 ? 
Pr1 O31 2.427(2) . ? 
Pr1 O11 2.441(2) . ? 
Pr1 O12 2.462(2) 2_656 ? 
Pr1 O1W 2.468(2) . ? 
Pr1 O21 2.481(2) . ? 
Pr1 N1 2.661(3) . ? 
Pr1 N2 2.675(3) . ? 
Pr1 Pr1 4.4018(9) 2_656 ? 
Pr1 Pr1 6.3532(13) 2_756 ? 
O1W H1WA 0.947(10) . ? 
O1W H1WB 0.951(10) . ? 
O11 C107 1.248(4) . ? 
O12 C107 1.260(4) . ? 
O12 Pr1 2.462(2) 2_656 ? 
O21 C207 1.250(4) . ? 
O22 C207 1.263(3) . ? 
O22 Pr1 2.405(2) 2_656 ? 
O31 C307 1.272(4) . ? 
O32 C307 1.239(4) . ? 
N1 C1 1.327(5) . ? 
N1 C12 1.352(4) . ? 
N2 C10 1.319(5) . ? 
N2 C11 1.357(4) . ? 
N11 C108 1.134(5) . ? 
N21 C208 1.141(5) . ? 
N31 C308 1.136(7) . ? 
C1 C2 1.396(6) . ? 
C1 H1A 0.9300 . ? 
C2 C3 1.350(7) . ? 
C2 H2A 0.9300 . ? 
C3 C4 1.393(7) . ? 
C3 H3A 0.9300 . ? 
C4 C12 1.419(5) . ? 
C4 C5 1.441(7) . ? 
C5 C6 1.356(8) . ? 
C5 H5A 0.9300 . ? 
C6 C7 1.422(7) . ? 
C6 H6A 0.9300 . ? 
C7 C8 1.400(7) . ? 
C7 C11 1.410(5) . ? 
C8 C9 1.354(8) . ? 
C8 H8A 0.9300 . ? 
C9 C10 1.404(5) . ? 
C9 H9A 0.9300 . ? 
C10 H10A 0.9300 . ? 
C11 C12 1.441(5) . ? 
C101 C102 1.380(4) . ? 
C101 C106 1.376(5) . ? 
C101 C107 1.506(4) . ? 
C102 C103 1.376(5) . ? 
C102 H10B 0.9300 . ? 
C103 C104 1.367(5) . ? 
C103 H10C 0.9300 . ? 
C104 C105 1.380(6) . ? 
C104 C108 1.454(6) . ? 
C105 C106 1.375(5) . ? 
C105 H10D 0.9300 . ? 
C106 H10E 0.9300 . ? 
C201 C206 1.368(4) . ? 
C201 C202 1.381(4) . ? 
C201 C207 1.506(4) . ? 
C202 C203 1.373(5) . ? 
C202 H20A 0.9300 . ? 
C203 C204 1.382(6) . ? 
C203 H20B 0.9300 . ? 
C204 C205 1.374(5) . ? 
C204 C208 1.439(5) . ? 
C205 C206 1.377(5) . ? 
C205 H20C 0.9300 . ? 
C206 H20D 0.9300 . ? 
C301 C306 1.376(5) . ? 
C301 C302 1.389(5) . ? 
C301 C307 1.499(5) . ? 
C302 C303 1.384(6) . ? 
C302 H30A 0.9300 . ? 
C303 C304 1.371(7) . ? 
C303 H30B 0.9300 . ? 
C304 C305 1.376(7) . ? 
C304 C308 1.437(7) . ? 
C305 C306 1.369(6) . ? 
C305 H30C 0.9300 . ? 
C306 H30D 0.9300 . ? 
 
loop_ 
 _geom_angle_atom_site_label_1 
 _geom_angle_atom_site_label_2 
 _geom_angle_atom_site_label_3 
 _geom_angle 
 _geom_angle_site_symmetry_1 
 _geom_angle_site_symmetry_3 
 _geom_angle_publ_flag 
O22 Pr1 O31 87.98(8) 2_656 . ? 
O22 Pr1 O11 76.35(7) 2_656 . ? 
O31 Pr1 O11 137.41(8) . . ? 
O22 Pr1 O12 71.70(7) 2_656 2_656 ? 
O31 Pr1 O12 82.81(8) . 2_656 ? 
O11 Pr1 O12 126.80(7) . 2_656 ? 
O22 Pr1 O1W 143.58(7) 2_656 . ? 
O31 Pr1 O1W 71.71(8) . . ? 
O11 Pr1 O1W 138.38(7) . . ? 
O12 Pr1 O1W 75.91(7) 2_656 . ? 
O22 Pr1 O21 121.91(8) 2_656 . ? 
O31 Pr1 O21 143.24(8) . . ? 
O11 Pr1 O21 75.28(8) . . ? 
O12 Pr1 O21 86.93(8) 2_656 . ? 
O1W Pr1 O21 71.57(7) . . ? 
O22 Pr1 N1 81.98(8) 2_656 . ? 
O31 Pr1 N1 68.19(8) . . ? 
O11 Pr1 N1 70.52(8) . . ? 
O12 Pr1 N1 141.37(8) 2_656 . ? 
O1W Pr1 N1 115.63(8) . . ? 
O21 Pr1 N1 131.49(8) . . ? 
O22 Pr1 N2 138.75(8) 2_656 . ? 
O31 Pr1 N2 95.28(8) . . ? 
O11 Pr1 N2 73.70(8) . . ? 
O12 Pr1 N2 149.54(8) 2_656 . ? 
O1W Pr1 N2 74.67(8) . . ? 
O21 Pr1 N2 76.48(8) . . ? 
N1 Pr1 N2 61.67(9) . . ? 
O22 Pr1 Pr1 46.92(5) 2_656 2_656 ? 
O31 Pr1 Pr1 130.22(6) . 2_656 ? 
O11 Pr1 Pr1 61.36(5) . 2_656 ? 
O12 Pr1 Pr1 65.69(5) 2_656 2_656 ? 
O1W Pr1 Pr1 129.67(5) . 2_656 ? 
O21 Pr1 Pr1 75.00(5) . 2_656 ? 
N1 Pr1 Pr1 114.69(7) . 2_656 ? 
N2 Pr1 Pr1 131.31(6) . 2_656 ? 
O22 Pr1 Pr1 119.64(5) 2_656 2_756 ? 
O31 Pr1 Pr1 84.29(6) . 2_756 ? 
O11 Pr1 Pr1 137.84(5) . 2_756 ? 
O12 Pr1 Pr1 47.94(5) 2_656 2_756 ? 
O1W Pr1 Pr1 31.17(5) . 2_756 ? 
O21 Pr1 Pr1 63.13(6) . 2_756 ? 
N1 Pr1 Pr1 144.90(6) . 2_756 ? 
N2 Pr1 Pr1 101.60(6) . 2_756 ? 
Pr1 Pr1 Pr1 99.56(2) 2_656 2_756 ? 
Pr1 O1W H1WA 132(2) . . ? 
Pr1 O1W H1WB 110(2) . . ? 
H1WA O1W H1WB 107(3) . . ? 
C107 O11 Pr1 140.82(19) . . ? 
C107 O12 Pr1 128.01(17) . 2_656 ? 
C207 O21 Pr1 115.36(18) . . ? 
C207 O22 Pr1 170.9(2) . 2_656 ? 
C307 O31 Pr1 141.3(2) . . ? 
C1 N1 C12 117.9(3) . . ? 
C1 N1 Pr1 121.1(2) . . ? 
C12 N1 Pr1 120.8(2) . . ? 
C10 N2 C11 118.7(3) . . ? 
C10 N2 Pr1 121.2(2) . . ? 
C11 N2 Pr1 120.0(2) . . ? 
N1 C1 C2 123.6(4) . . ? 
N1 C1 H1A 118.2 . . ? 
C2 C1 H1A 118.2 . . ? 
C3 C2 C1 118.5(5) . . ? 
C3 C2 H2A 120.8 . . ? 
C1 C2 H2A 120.8 . . ? 
C2 C3 C4 120.7(4) . . ? 
C2 C3 H3A 119.6 . . ? 
C4 C3 H3A 119.6 . . ? 
C3 C4 C12 117.1(4) . . ? 
C3 C4 C5 124.5(5) . . ? 
C12 C4 C5 118.4(5) . . ? 
C6 C5 C4 122.9(5) . . ? 
C6 C5 H5A 118.6 . . ? 
C4 C5 H5A 118.6 . . ? 
C5 C6 C7 118.6(5) . . ? 
C5 C6 H6A 120.7 . . ? 
C7 C6 H6A 120.7 . . ? 
C8 C7 C11 116.1(4) . . ? 
C8 C7 C6 122.1(5) . . ? 
C11 C7 C6 121.8(5) . . ? 
C9 C8 C7 121.5(4) . . ? 
C9 C8 H8A 119.2 . . ? 
C7 C8 H8A 119.2 . . ? 
C8 C9 C10 118.2(5) . . ? 
C8 C9 H9A 120.9 . . ? 
C10 C9 H9A 120.9 . . ? 
N2 C10 C9 122.7(4) . . ? 
N2 C10 H10A 118.6 . . ? 
C9 C10 H10A 118.6 . . ? 
N2 C11 C7 122.5(4) . . ? 
N2 C11 C12 118.7(3) . . ? 
C7 C11 C12 118.8(4) . . ? 
N1 C12 C4 122.1(4) . . ? 
N1 C12 C11 118.4(3) . . ? 
C4 C12 C11 119.5(4) . . ? 
C102 C101 C106 119.6(3) . . ? 
C102 C101 C107 119.7(3) . . ? 
C106 C101 C107 120.5(3) . . ? 
C103 C102 C101 120.9(3) . . ? 
C103 C102 H10B 119.6 . . ? 
C101 C102 H10B 119.6 . . ? 
C102 C103 C104 119.0(3) . . ? 
C102 C103 H10C 120.5 . . ? 
C104 C103 H10C 120.5 . . ? 
C105 C104 C103 120.9(3) . . ? 
C105 C104 C108 120.0(4) . . ? 
C103 C104 C108 119.0(4) . . ? 
C104 C105 C106 119.8(4) . . ? 
C104 C105 H10D 120.1 . . ? 
C106 C105 H10D 120.1 . . ? 
C101 C106 C105 119.9(3) . . ? 
C101 C106 H10E 120.1 . . ? 
C105 C106 H10E 120.1 . . ? 
O11 C107 O12 125.6(3) . . ? 
O11 C107 C101 116.7(3) . . ? 
O12 C107 C101 117.7(3) . . ? 
N11 C108 C104 179.2(6) . . ? 
C206 C201 C202 118.9(3) . . ? 
C206 C201 C207 120.9(3) . . ? 
C202 C201 C207 120.1(3) . . ? 
C203 C202 C201 120.9(3) . . ? 
C203 C202 H20A 119.6 . . ? 
C201 C202 H20A 119.6 . . ? 
C202 C203 C204 119.8(3) . . ? 
C202 C203 H20B 120.1 . . ? 
C204 C203 H20B 120.1 . . ? 
C205 C204 C203 119.3(3) . . ? 
C205 C204 C208 120.5(4) . . ? 
C203 C204 C208 120.2(4) . . ? 
C204 C205 C206 120.4(3) . . ? 
C204 C205 H20C 119.8 . . ? 
C206 C205 H20C 119.8 . . ? 
C201 C206 C205 120.6(3) . . ? 
C201 C206 H20D 119.7 . . ? 
C205 C206 H20D 119.7 . . ? 
O21 C207 O22 123.4(3) . . ? 
O21 C207 C201 119.1(3) . . ? 
O22 C207 C201 117.5(3) . . ? 
N21 C208 C204 179.7(7) . . ? 
C306 C301 C302 119.0(4) . . ? 
C306 C301 C307 121.8(3) . . ? 
C302 C301 C307 119.2(3) . . ? 
C301 C302 C303 120.1(4) . . ? 
C301 C302 H30A 120.0 . . ? 
C303 C302 H30A 120.0 . . ? 
C304 C303 C302 119.9(4) . . ? 
C304 C303 H30B 120.0 . . ? 
C302 C303 H30B 120.0 . . ? 
C305 C304 C303 120.0(4) . . ? 
C305 C304 C308 121.1(6) . . ? 
C303 C304 C308 119.0(5) . . ? 
C304 C305 C306 120.2(5) . . ? 
C304 C305 H30C 119.9 . . ? 
C306 C305 H30C 119.9 . . ? 
C301 C306 C305 120.7(4) . . ? 
C301 C306 H30D 119.7 . . ? 
C305 C306 H30D 119.7 . . ? 
O32 C307 O31 125.0(3) . . ? 
O32 C307 C301 118.4(3) . . ? 
O31 C307 C301 116.6(3) . . ? 
N31 C308 C304 178.7(11) . . ? 
 
loop_ 
 _geom_hbond_atom_site_label_D 
 _geom_hbond_atom_site_label_H 
 _geom_hbond_atom_site_label_A 
 _geom_hbond_distance_DH 
 _geom_hbond_distance_HA 
 _geom_hbond_distance_DA 
 _geom_hbond_angle_DHA 
 _geom_hbond_site_symmetry_A 
O1W H1WB O32  0.951(10) 1.697(15) 2.618(3) 162(3) . 
 
_diffrn_measured_fraction_theta_max    0.989 
_diffrn_reflns_theta_full              25.03 
_diffrn_measured_fraction_theta_full   0.989 
_refine_diff_density_max    0.539 
_refine_diff_density_min   -0.500 
_refine_diff_density_rms    0.061 
